# Supplementary material for: Using a Very Low Energy Diet to Achieve Substantial Preconception Weight Loss in Women with Obesity: A Review of the Safety and Efficacy
Source: MDPI journal article supplement (doi:10.3390/nu14204423), 2022-10-21
Supplement: s1 [file s1]

**Table S1.** Search terms used in systematic review.

| Concept              | Search Terms                                                                                                                                                                     |
|----------------------|----------------------------------------------------------------------------------------------------------------------------------------------------------------------------------|
| Obesity              | Obesity[tw] OR overweight[tw] OR weight[tw] OR “weight loss” [tw] OR “body weight” [tw] OR "Obesity"[Mesh]                                                                       |
| Very Low Energy Diet | “Very Low Energy Diet” [tw] OR “Very Low Calorie Diet” [tw] OR VLED[tw] OR VLCD[tw] OR “Low Calorie Diet” [tw] OR “Ketogenic Diet” [tw] OR "Diet, Carbohydrate-Restricted"[Mesh] |
| Preconception        | Preconcep*[tw] OR prepreg*[tw] OR pregnan*[tw] OR concep*[tw] OR "Preconception Care"[Mesh]                                                                                      |
